# Supplementary material for: Synergistic introduction of LSPR effect and Schottky junction: Cu@TiO2 charge regulation achieved efficient, stable photocatalytic removal
Source: Royal Society of Chemistry journal article supplement (doi:10.1039/d4qi02870h), 2025-01-01
Supplement: d4qi02870h1.pdf [file d4qi02870h1.pdf]

## **Synergistic introduction of LSPR effect and Schottky junction: Cu@TiO<sub>2</sub> charge regulation achieves efficient, stable photocatalytic removal**

Shuzhe Zhang<sup>a</sup>, Xiumei Li<sup>b</sup>, Ruyan Xie<sup>a</sup>, Xiaozhen Zhang<sup>a</sup>, He Wang<sup>a</sup>, Yanhua Song<sup>a</sup>  
and Haifeng Zou<sup>\*a</sup>

<sup>a</sup> Department of Chemical Engineering and Applied Chemistry, College of Chemistry, Jilin University, Qianjin Street 2699, Changchun 130012, China.

<sup>b</sup> State Key Laboratory of Supramolecular Structure and Materials, College of Chemistry, Jilin University, Qianjin Street 2699, Changchun 130012, China.

### **Corresponding Author:**

\*E-mail: haifengzou0431@sohu.com

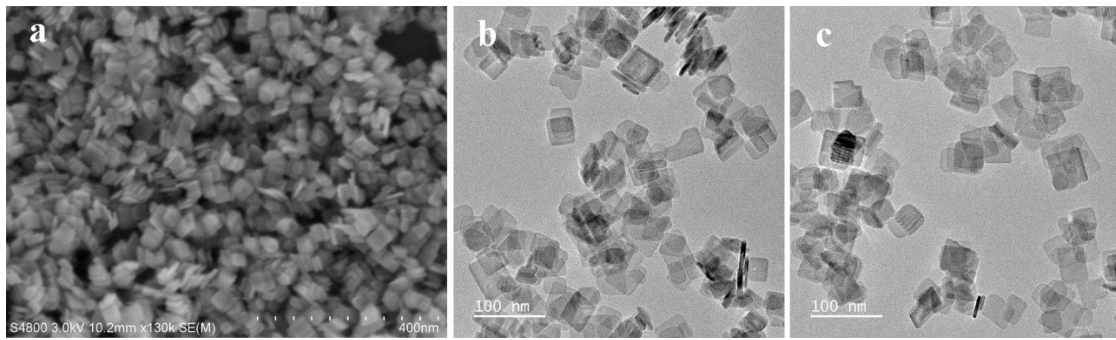

**Fig. S1.** (a) SEM and (b-c) TEM images of  $\text{TiO}_2$  nanosheets.

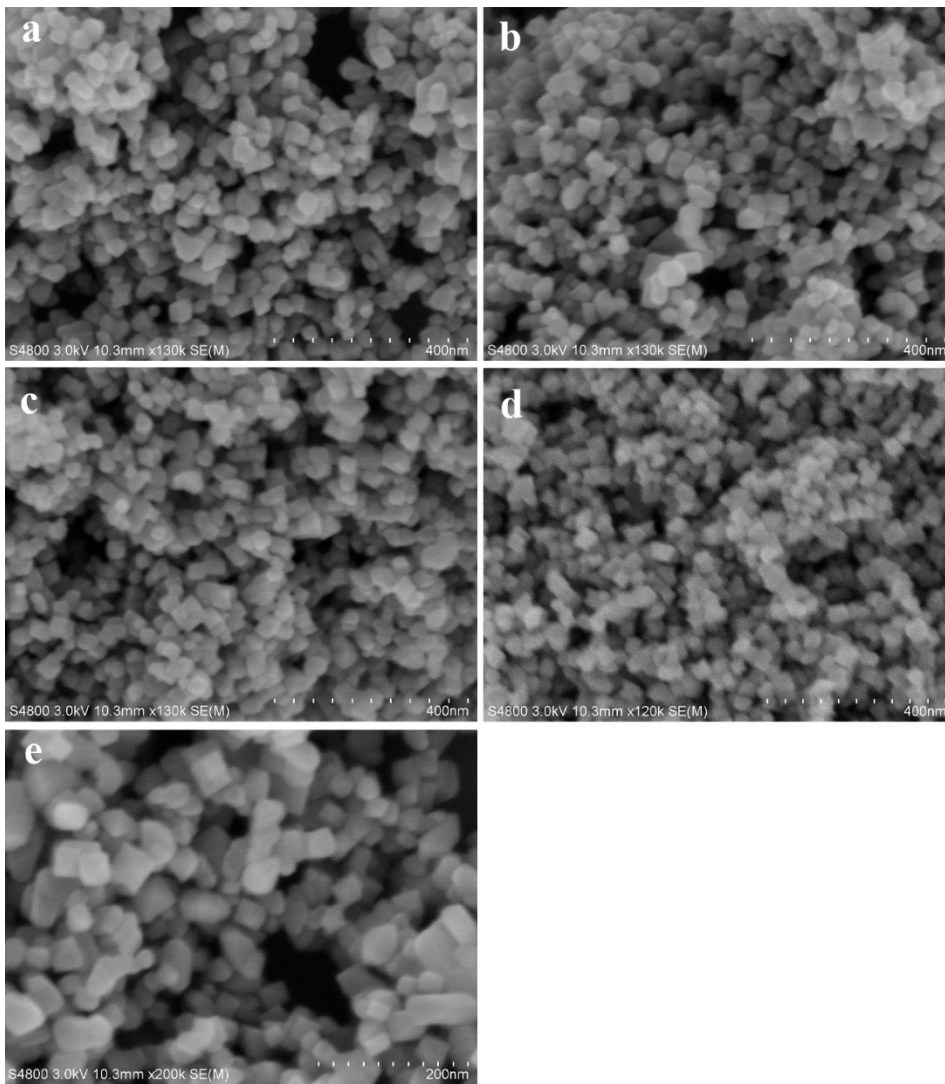

**Fig. S2.** SEM images of (a)  $\text{Cu}_0@T$ , (b)  $\text{Cu}_5@T$ , (c)  $\text{Cu}_{10}@T$ , (d)  $\text{Cu}_{15}@T$  and (e)  $\text{Cu}_{20}@T$ , respectively.

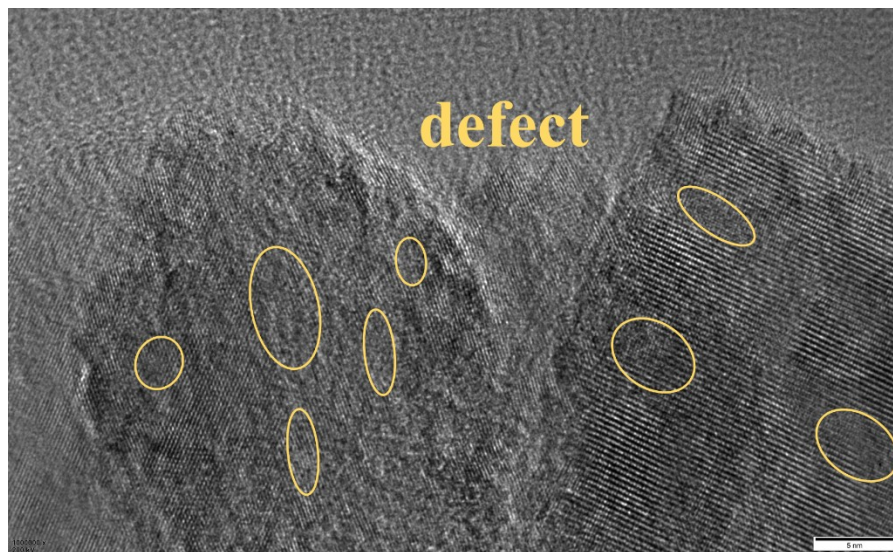

Fig. S3. HRTEM image of Cu<sub>10</sub>@T.

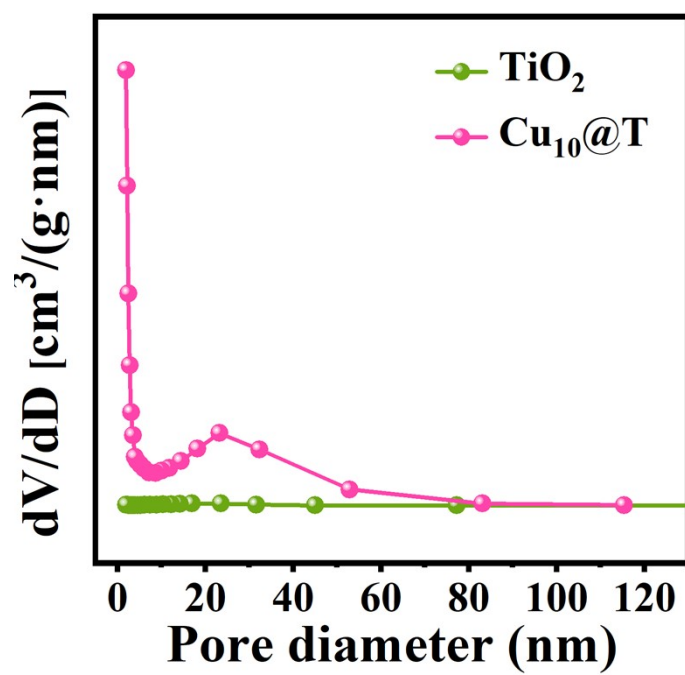

Fig. S4. BJH pore size distribution curves of TiO<sub>2</sub> and Cu<sub>10</sub>@T.

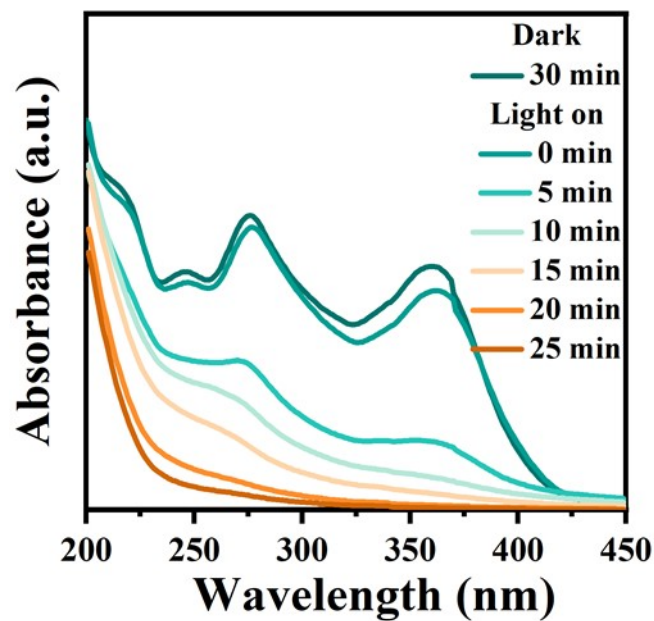

Fig. S5. UV-vis spectral changes of TC at different times after the addition of  $\text{Cu}_{10}@\text{T}$ .

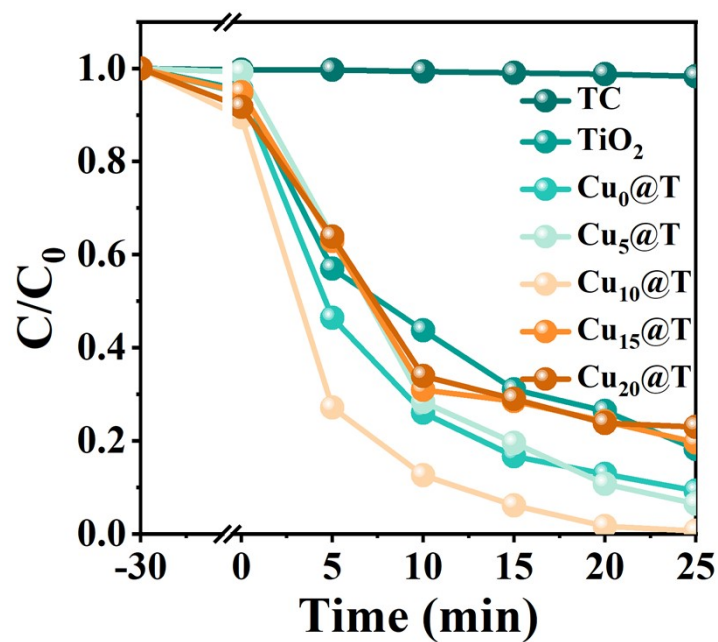

Fig. S6. Photodegradation performance of TC by different samples.

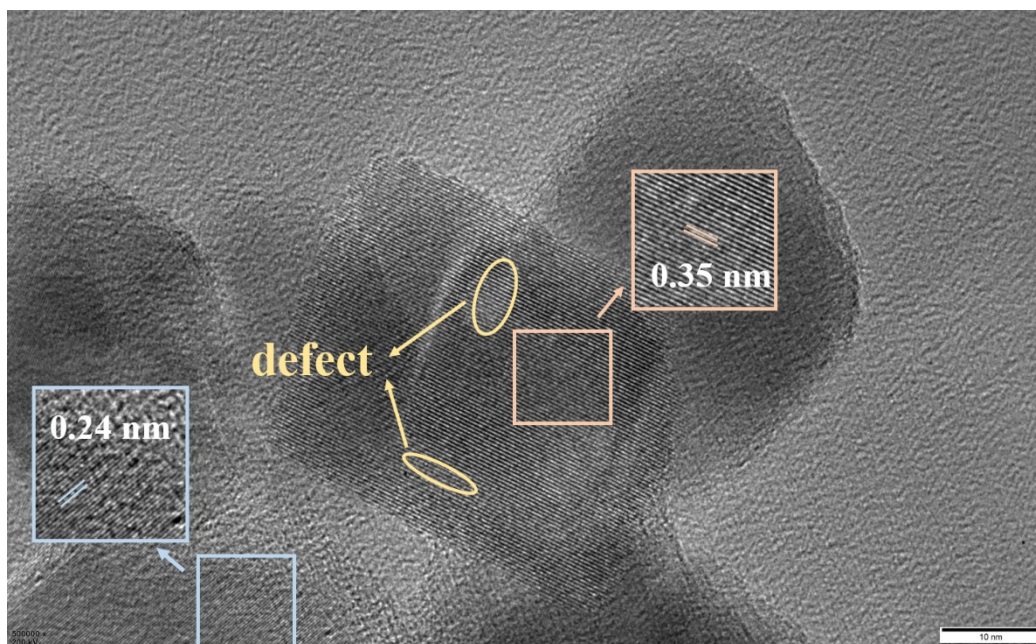

**Fig. S7.** The HRTEM image of the used Cu<sub>10</sub>@T.

**Table. S1** Elemental content of the Cu<sub>10</sub>@T sample.

| Element | Mass fraction (%) | Atomic percent (%) |
|---------|-------------------|--------------------|
| O       | 47.43             | 73.17              |
| Ti      | 50.59             | 26.07              |
| Cu      | 1.98              | 0.77               |
